# Supplementary material
Source: PubMed Central journal article supplement (PMC4679060)
Supplement: pnas.1521077112.sapp.pdf [file pnas.1521077112.sapp.pdf]

## **Supporting Information Appendix**

**Table S1. Larval and adult phenotypes of G<sub>2</sub> progeny of lines 10.1 and 10.2 G<sub>1</sub> outcrosses to wild-type mosquitoes.**

**Table S2. List of oligonucleotide primers.**

**Table S3. G<sub>3</sub> larval phenotypes of line 10.1 G<sub>2</sub> outcrosses to wild-type mosquitoes.**

**Table S4. G<sub>3</sub> larval phenotypes of line 10.2 G<sub>2</sub> outcrosses to wild-type mosquitoes.**

**Table S5. G<sub>3</sub> adult phenotypes of line 10.1 G<sub>2</sub> outcrosses to wild-type mosquitoes.**

**Table S6. G<sub>3</sub> adult phenotypes of line 10.2 G<sub>2</sub> outcrosses to wild-type mosquitoes.**

**Table S7. G<sub>4</sub> larval phenotypes of line 10.1 G<sub>3</sub> outcrosses to wild-type mosquitoes.**

**Table S8. G<sub>4</sub> larval phenotypes of line 10.2 G<sub>3</sub> outcrosses to wild-type mosquitoes.**

**Table S9. G<sub>4</sub> larval phenotypes of lines 10.1 and 10.2 batch G<sub>3</sub> intercrosses.**

**Table S10. G<sub>4</sub> adult phenotypes of line 10.1 G<sub>3</sub> outcrosses to wild-type mosquitoes.**

**Table S11. G<sub>4</sub> adult phenotypes of line 10.2 G<sub>3</sub> outcrosses to wild-type mosquitoes.**

**Figure S1. Molecular confirmation of the precise insertion of the AsMCRkh2 cargo into the *kh<sup>w</sup>* locus.**

**Figure S2. Nucleotide sequences of the kh2 target sites in selected G<sub>2</sub> gene-drive phenotypes.**

**Figure S3. Gene amplification of the kh2 target sites in selected G<sub>3</sub> founder mosquitoes.**

## **Supporting Materials and Methods**

## **References**

| Table S1. Larval and adult phenotypes of G <sub>2</sub> progeny of lines 10.1 and 10.2 G <sub>1</sub> outcrosses to wild-type mosquitoes. |                                      |                                      |                        |                                      |                                      |                                      |                                      |                                      |                                      |                                      |                                      |                                      |
|-------------------------------------------------------------------------------------------------------------------------------------------|--------------------------------------|--------------------------------------|------------------------|--------------------------------------|--------------------------------------|--------------------------------------|--------------------------------------|--------------------------------------|--------------------------------------|--------------------------------------|--------------------------------------|--------------------------------------|
| G <sub>1</sub><br>Founder                                                                                                                 | Larval phenotypes *                  |                                      |                        |                                      | Adult phenotypes *                   |                                      |                                      |                                      |                                      |                                      |                                      |                                      |
|                                                                                                                                           |                                      |                                      |                        |                                      | Males                                |                                      |                                      |                                      | Females                              |                                      |                                      |                                      |
|                                                                                                                                           | DsRed <sup>+</sup> /kh <sup>w+</sup> | DsRed <sup>+</sup> /kh <sup>w-</sup> | DsRed/kh <sup>w+</sup> | DsRed <sup>-</sup> /kh <sup>w-</sup> | DsRed <sup>+</sup> /kh <sup>w+</sup> | DsRed <sup>+</sup> /kh <sup>w-</sup> | DsRed <sup>-</sup> /kh <sup>w+</sup> | DsRed <sup>-</sup> /kh <sup>w-</sup> | DsRed <sup>+</sup> /kh <sup>w+</sup> | DsRed <sup>+</sup> /kh <sup>w-</sup> | DsRed <sup>-</sup> /kh <sup>w+</sup> | DsRed <sup>-</sup> /kh <sup>w-</sup> |
| 10.1 ♂                                                                                                                                    | 16                                   |                                      |                        |                                      | 6                                    |                                      |                                      |                                      | 8                                    |                                      |                                      |                                      |
| 10.2 ♂                                                                                                                                    | 64                                   |                                      | 76                     |                                      | 32                                   |                                      | 38                                   |                                      | 25                                   |                                      | 34                                   |                                      |
| * Shaded cells are G <sub>2</sub> progeny positive for DsRed (DsRed <sup>+</sup> ).                                                       |                                      |                                      |                        |                                      |                                      |                                      |                                      |                                      |                                      |                                      |                                      |                                      |

| <b>Table S2. List of oligonucleotide primers.*</b> |                                                                                                             |                  |
|----------------------------------------------------|-------------------------------------------------------------------------------------------------------------|------------------|
| <b>Primer</b>                                      | <b>Sequence (5'-3')</b>                                                                                     | <b>Reference</b> |
| Vg451                                              | GTACGCGTATCGATAAGCTT <sub>taa</sub> GATACATTGATGAGTTTGG                                                     | This study       |
| Vg452                                              | TAGGCCGGCCGATCTCGGATCTGACAATG                                                                               | This study       |
| Vg453                                              | GCTTATCGATACGCGTACGCATCTGCATCCTGGTACCACAGTCTTATTGG                                                          | This study       |
| Vg454                                              | GTACTTCTTATCCATCTTCTAGATCGATTTTAAGCACGCCGC                                                                  | This study       |
| Vg455                                              | CTAGGAAGATGGATAAGAAGTACTCGATCGGTCTGGATATCGG                                                                 | This study       |
| Vg456                                              | CTCTCGTTACACCTTGCGCTTCTTCTCGGCCG                                                                            | This study       |
| Vg457                                              | GCAAGGTGTAACGAGAGTTCGGTGCGAATCTCTCTTGTATTTCCTCC                                                             | This study       |
| Vg458                                              | AGATCGGCCGGCCTAACCAAGGCCAGCCTGTTGAGC                                                                        | This study       |
| Vg464                                              | AAGCTTATCGATACGCGTACCTCAACTGCCGACGAGTTGCTCG                                                                 | This study       |
| Vg465                                              | ATCCGAGATCGGCCGGCCTACGTTCTGCGTGCTGTTGTAAGGTTCC                                                              | This study       |
| Vg494                                              | GGTATCAGCTCACTCAAAGGCGGTAATACGG                                                                             | This study       |
| Vg495                                              | GAAAGGGCCTCGTGATACGCCTATTTTTATAGG                                                                           | This study       |
| Vg498                                              | CCTTTGAGTGAGCTGATACCCCCAAAAATTGACCTCAGATCTCTCAAGAAGCG                                                       | This study       |
| Vg499                                              | GCGTATCACGAGGCCCTTTCGCATCTGAACGAGGTGCTGCTAAATGG                                                             | This study       |
| Vg500                                              | GTTTTAGAGCTAGAAATAGCAAGTTAAAATAAGGCTAGTCCGTTATCAACTTGAAAAAGTGGCACCGAGTCGGTGTCTTTTTGTGGAAATTGATTCACTGTTTTAGG | This study       |
| Vg501                                              | AGGTCTTCTCGAAGACCCCAAGGGAGGGGGCAAATGGGTGG                                                                   | This study       |
| Vg505                                              | GTCCACTAACGAAAGAGGTCAAGAGC                                                                                  | This study       |
| Vg507                                              | CGATCGTTTAGTGACGAGATCACGC                                                                                   | This study       |
| Vg537                                              | CTTGATGGTTCCGTTCTACGGGC                                                                                     | This study       |
| Vg538                                              | AAACGCCCGTAGAACGGAACCAT                                                                                     | This study       |
| Vg543                                              | CATGTACATTTCTTTTACGttaattaaCGTAGAACGGAACCATCGCGTGC                                                          | This study       |
| Vg544                                              | ATGGTTCGGTTCTACGttaattaaCGTAAAAGGAAATGTACATGGTAAAGCAATCTGACG                                                | This study       |
| Vg546                                              | CCGGGCGAGCTCGactcgagcCTGGTACCACAGTCTTATTGGCGTGATGG                                                          | This study       |
| Vg551                                              | CAATAAGACTGTGGTACCAGgctcgagTTGTTTGATCGCACGGTTCACACAATGG                                                     | This study       |
| Vg552                                              | CCTTACAACAGCCACGCAGAACGggatccGGCAGGGCATGAACGCGGGCTTTGAAGAC                                                  | This study       |
| Vg553                                              | GCCCCGCTTCATGCCCTGCCggaatccCGTTCTGCGTGCTGTTGTAAGGTTTCG                                                      | This study       |
| Vg554                                              | GCTCAACAGGCTGGCCTTGGTActcgagCTCAACTGCCGACGAGTTGCTCG                                                         | This study       |
| Vg555                                              | CAACTCGTCGGCAGTTGAGctcgagTACCAAGGCCAGCCTGTTGAGCAGCTTGC                                                      | This study       |
| Vg557                                              | CGATCGTTTAGTGACGAGATCACGC                                                                                   | This study       |
| dsCas9 1 F                                         | TAATACGACTCACTATAGTGCCATCCTGCTGTCGGATA                                                                      | This study       |
| dsCas9 1 R                                         | TAATACGACTCACTATAGCTTCGGCAGCACCTTCTCGT                                                                      | This study       |
| dsKu70 F                                           | TAATACGACTCACTATAGCTACGGCATTGGGTTTGTCT                                                                      | This study       |
| dsKu70 R                                           | TAATACGACTCACTATAGGCTTAGCTTGTAGCCGGATG                                                                      | This study       |
| G1F2                                               | CGTATGCTGCACGACGTTAAC                                                                                       | This study       |

|                                                                            |                               |            |
|----------------------------------------------------------------------------|-------------------------------|------------|
| G2R1                                                                       | CTGGACATCTGCTTCTGAG           | This study |
| G2R2                                                                       | GCAATAGCTGACTCCTG             | This study |
| Km1F1                                                                      | CGATGCGATCGAGCTAATTG          | This study |
| Km2R1                                                                      | GTGACGAGATCACGCATCTG          | This study |
| Vg5'R1                                                                     | CGTTTGGTGCTCAGCTCAGAC         | This study |
| Vg5'R2                                                                     | GTCGTAGGTGGTGGTATGCTAAC       | This study |
| U6F1                                                                       | CTACCTGTACGATGGCTTAAG         | This study |
| m2A10 FOR                                                                  | GAGACGGTGAAGATCTCGTGCAAGG     | 1          |
| m2A10 REV                                                                  | GCTTCGTACCACCACCGAACACGTA     | 1          |
| m1C3 FOR                                                                   | AAGGGCTCGCTGAAACTGT           | 1          |
| m1C3 REV                                                                   | ACAGAAGTACACCGCCAGGT          | 1          |
| AsVg1 for                                                                  | CAACATCATGTCCAAGTCGGAGGTGA    | 2          |
| AsVg1 rev                                                                  | CTTGAAGCTTTCGTGCTCTTCCTCCG    | 2          |
| AsCPAFOR                                                                   | CTTTACGGAAACGCTCGAAG          | 3          |
| AsCPAREV                                                                   | CCATAGCAGAATGGACCGTAA-3'      | 3          |
| Asrib26Sfor                                                                | AATCCTTCCCGAAGGACATGAACCG     | 4          |
| Asrib26Srev                                                                | TACGAAACAAATCCCATCCTAATCGAAGC | 4          |
| *Lowercase letters are introduced restriction endonuclease cleavage sites. |                               |            |

**Table S3. G<sub>3</sub> larval phenotypes of line 10.1 G<sub>2</sub> outcrosses to wild-type mosquitoes.**

| Founder <sup>†</sup> | Cross                 | Larval phenotypes <sup>*</sup> |                    |
|----------------------|-----------------------|--------------------------------|--------------------|
|                      |                       | DsRed <sup>+</sup>             | DsRed <sup>-</sup> |
| ♂                    | 10.1.1                | 346                            | 2                  |
|                      | 10.1.3                | 136                            |                    |
|                      | 10.1.5                | 129                            | 1                  |
|                      | 10.1.6                | 218                            |                    |
|                      | Subtotal <sup>‡</sup> | 829                            | 3                  |
| ♀                    | 10.1.1                | 61                             | 1                  |
|                      | 10.1.2                | 109                            | 2                  |
|                      | 10.1.3                | 48                             | 1                  |
|                      | 10.1.4                | 85                             |                    |
|                      | 10.1.5                | 85                             |                    |
|                      | 10.1.7                | 41                             |                    |
|                      | 10.1.8                | 63                             |                    |
|                      | Subtotal <sup>‡</sup> | 492                            | 4                  |
|                      | Total                 | 1321                           | 7                  |

<sup>\*</sup>Shaded cells are G<sub>3</sub> progeny positive for DsRed (DsRed<sup>+</sup>).

<sup>†</sup>Progeny of single G<sub>2</sub> male or female out-crossed to wild-types of the opposite sex.

<sup>‡</sup> $\chi^2$  analyses show significant differences ( $p < 0.0001$ ) in DsRed<sup>+</sup>:DsRed<sup>-</sup> ratios from random segregation.

**Table S4. G<sub>3</sub> larval phenotypes of line 10.2 G<sub>2</sub> outcrosses to wild-type mosquitoes.**

| Founder        | Cross                 | Larval phenotypes <sup>*</sup> |                    |                        |
|----------------|-----------------------|--------------------------------|--------------------|------------------------|
|                |                       | DsRed <sup>+</sup>             | DsRed <sup>-</sup> | DsRed/kh <sup>w-</sup> |
| ♀ <sup>†</sup> | 10.2.3                | 109                            |                    | 1                      |
|                | 10.2.4                | 141                            |                    |                        |
|                | 10.2.5                | 82                             |                    |                        |
|                | 10.2.6                | 100                            |                    |                        |
|                | 10.2.8                | 163                            |                    | 1                      |
|                | 10.2.10               | 146                            |                    |                        |
|                | 10.2.11               | 90                             |                    |                        |
|                | 10.2.12               | 117                            | 1                  |                        |
|                | 10.2.13               | 119                            |                    |                        |
|                | 10.2.14               | 70                             |                    |                        |
|                | 10.2.15               | 9                              | 1                  |                        |
|                | 10.2.16               | 89                             | 7                  |                        |
|                | 10.2.17               | 131                            | 1                  |                        |
|                | 10.2.18               | 112                            |                    | 1                      |
|                | 10.2.19               | 93                             |                    |                        |
|                | Subtotal <sup>§</sup> | 1571                           | 10                 | 3                      |
| ♂ <sup>‡</sup> | Batch <sup>§</sup>    | 3060                           | 25                 |                        |
|                | Total <sup>§</sup>    | 4631                           | 35                 | 3                      |

<sup>\*</sup>Shaded cells are G<sub>3</sub> progeny positive for DsRed (DsRed<sup>+</sup>).

<sup>†</sup>Progeny of single G<sub>2</sub> female out-crossed to wild-type males.

<sup>‡</sup>27 G<sub>2</sub> males out-crossed to 270 wild-type females.

<sup>§</sup> $\chi^2$  analyses show significant differences ( $p < 0.0001$ ) in DsRed<sup>+</sup>:DsRed<sup>-</sup> ratios from random segregation.

| <b>Table S5. G<sub>3</sub> adult phenotypes of line 10.1 G<sub>2</sub> outcrosses to wild-type mosquitoes.</b>                                                                                                                                                                                                                                                          |                          |                                          |                                          |                                 |                                          |                                          |                                          |                                          |                                 |                                          |                                          |
|-------------------------------------------------------------------------------------------------------------------------------------------------------------------------------------------------------------------------------------------------------------------------------------------------------------------------------------------------------------------------|--------------------------|------------------------------------------|------------------------------------------|---------------------------------|------------------------------------------|------------------------------------------|------------------------------------------|------------------------------------------|---------------------------------|------------------------------------------|------------------------------------------|
| <b>Founder<sup>†</sup></b>                                                                                                                                                                                                                                                                                                                                              | <b>Cross</b>             | <b>Adult phenotypes<sup>*</sup></b>      |                                          |                                 |                                          |                                          |                                          |                                          |                                 |                                          |                                          |
|                                                                                                                                                                                                                                                                                                                                                                         |                          | <b>Males</b>                             |                                          |                                 |                                          |                                          | <b>Females</b>                           |                                          |                                 |                                          |                                          |
|                                                                                                                                                                                                                                                                                                                                                                         |                          | <b>DsRed<sup>+</sup>/kh<sup>w+</sup></b> | <b>DsRed<sup>+</sup>/kh<sup>w-</sup></b> | <b>DsRed<sup>+</sup>/mosaic</b> | <b>DsRed<sup>-</sup>/kh<sup>w+</sup></b> | <b>DsRed<sup>-</sup>/kh<sup>w-</sup></b> | <b>DsRed<sup>+</sup>/kh<sup>w+</sup></b> | <b>DsRed<sup>+</sup>/kh<sup>w-</sup></b> | <b>DsRed<sup>+</sup>/mosaic</b> | <b>DsRed<sup>-</sup>/kh<sup>w+</sup></b> | <b>DsRed<sup>-</sup>/kh<sup>w-</sup></b> |
| ♂                                                                                                                                                                                                                                                                                                                                                                       | <b>10.1.1</b>            | 202                                      |                                          |                                 | 2                                        |                                          | 173                                      |                                          |                                 |                                          |                                          |
|                                                                                                                                                                                                                                                                                                                                                                         | <b>10.1.3</b>            | 54                                       |                                          |                                 |                                          |                                          | 91                                       |                                          |                                 |                                          |                                          |
|                                                                                                                                                                                                                                                                                                                                                                         | <b>10.1.5</b>            | 58                                       |                                          |                                 | 1                                        |                                          | 53                                       |                                          |                                 |                                          |                                          |
|                                                                                                                                                                                                                                                                                                                                                                         | <b>10.1.6</b>            | 100                                      |                                          |                                 |                                          |                                          | 102                                      |                                          |                                 |                                          |                                          |
|                                                                                                                                                                                                                                                                                                                                                                         | <b>Total<sup>‡</sup></b> | <b>414</b>                               |                                          |                                 | <b>3</b>                                 |                                          | <b>419</b>                               |                                          |                                 |                                          |                                          |
| ♀                                                                                                                                                                                                                                                                                                                                                                       | <b>10.1.1</b>            |                                          | 20                                       | 7                               | 1                                        |                                          |                                          | 18                                       | 7                               |                                          |                                          |
|                                                                                                                                                                                                                                                                                                                                                                         | <b>10.1.2</b>            |                                          | 26                                       | 4                               |                                          |                                          |                                          | 36                                       | 4                               | 2                                        |                                          |
|                                                                                                                                                                                                                                                                                                                                                                         | <b>10.1.3</b>            |                                          | 9                                        | 3                               |                                          |                                          |                                          | 15                                       | 3                               |                                          |                                          |
|                                                                                                                                                                                                                                                                                                                                                                         | <b>10.1.4</b>            |                                          | 26                                       |                                 |                                          |                                          |                                          | 32                                       | 4                               |                                          |                                          |
|                                                                                                                                                                                                                                                                                                                                                                         | <b>10.1.5</b>            |                                          | 38                                       | 7                               |                                          |                                          |                                          | 37                                       | 7                               |                                          |                                          |
|                                                                                                                                                                                                                                                                                                                                                                         | <b>10.1.7</b>            |                                          | 13                                       | 2                               |                                          |                                          |                                          | 19                                       |                                 |                                          |                                          |
|                                                                                                                                                                                                                                                                                                                                                                         | <b>10.1.8</b>            |                                          | 23                                       | 2                               |                                          |                                          |                                          | 23                                       | 2                               |                                          |                                          |
|                                                                                                                                                                                                                                                                                                                                                                         | <b>Total<sup>‡</sup></b> |                                          | <b>155</b>                               | <b>25</b>                       | <b>1</b>                                 |                                          |                                          | <b>180</b>                               | <b>27</b>                       | <b>2</b>                                 |                                          |
| <sup>*</sup> Shaded cells are G <sub>3</sub> progeny positive for DsRed (DsRed <sup>+</sup> ).<br><sup>†</sup> Progeny of single G <sub>2</sub> male or female out-crossed to wild-types of the opposite sex.<br><sup>‡</sup> $\chi^2$ analyses show significant differences ( $p < 0.0001$ ) in DsRed <sup>+</sup> :DsRed <sup>-</sup> ratios from random segregation. |                          |                                          |                                          |                                 |                                          |                                          |                                          |                                          |                                 |                                          |                                          |

| Table S6. G <sub>3</sub> adult phenotypes of line 10.2 G <sub>2</sub> outcrosses to wild-type mosquitoes. |                    |                                      |                                      |                                             |    |                                      |                                      |                                      |                                      |                                             |    |                                      |                                      |
|-----------------------------------------------------------------------------------------------------------|--------------------|--------------------------------------|--------------------------------------|---------------------------------------------|----|--------------------------------------|--------------------------------------|--------------------------------------|--------------------------------------|---------------------------------------------|----|--------------------------------------|--------------------------------------|
| Founde<br>r                                                                                               | Cross              | Adult phenotypes*                    |                                      |                                             |    |                                      |                                      |                                      |                                      |                                             |    |                                      |                                      |
|                                                                                                           |                    | Males                                |                                      |                                             |    |                                      |                                      | Females                              |                                      |                                             |    |                                      |                                      |
|                                                                                                           |                    | DsRed <sup>+</sup> /kh <sup>w+</sup> | DsRed <sup>+</sup> /kh <sup>w-</sup> | DsRed <sup>+</sup> /<br>mosaic <sup>§</sup> |    | DsRed <sup>-</sup> /kh <sup>w+</sup> | DsRed <sup>-</sup> /kh <sup>w-</sup> | DsRed <sup>+</sup> /kh <sup>w+</sup> | DsRed <sup>+</sup> /kh <sup>w-</sup> | DsRed <sup>+</sup> /<br>mosaic <sup>§</sup> |    | DsRed <sup>-</sup> /kh <sup>w+</sup> | DsRed <sup>-</sup> /kh <sup>w-</sup> |
| ♀ <sup>†</sup>                                                                                            | 10.2.3             |                                      | 66                                   | 5                                           | ND |                                      |                                      |                                      | 44                                   |                                             | ND |                                      |                                      |
|                                                                                                           | 10.2.4             |                                      | 64                                   |                                             | ND |                                      |                                      |                                      | 61                                   |                                             | ND |                                      |                                      |
|                                                                                                           | 10.2.5             |                                      | 36                                   | 7                                           | ND |                                      |                                      |                                      | 32                                   | 3                                           | ND |                                      |                                      |
|                                                                                                           | 10.2.6             |                                      | 36                                   | 2                                           | ND |                                      |                                      |                                      | 33                                   |                                             | ND |                                      |                                      |
|                                                                                                           | 10.2.8             |                                      | 60                                   |                                             | ND |                                      |                                      |                                      | 51                                   |                                             | ND |                                      |                                      |
|                                                                                                           | 10.2.10            |                                      | 48                                   | 2                                           | 20 |                                      |                                      |                                      | 49                                   | 3                                           | 14 |                                      |                                      |
|                                                                                                           | 10.2.11            |                                      | 30                                   | 1                                           | 8  |                                      |                                      |                                      | 41                                   | 2                                           | 4  |                                      |                                      |
|                                                                                                           | 10.2.12            |                                      | 36                                   | 3                                           | 10 |                                      |                                      |                                      | 38                                   | 3                                           | 7  |                                      |                                      |
|                                                                                                           | 10.2.13            |                                      | 38                                   | 2                                           | 7  |                                      |                                      |                                      | 42                                   | 2                                           | 1  |                                      |                                      |
|                                                                                                           | 10.2.14            |                                      | 22                                   | 1                                           | 7  |                                      |                                      |                                      | 29                                   | 2                                           | 3  |                                      |                                      |
|                                                                                                           | 10.2.15            |                                      | 4                                    |                                             | 2  |                                      |                                      |                                      | 2                                    |                                             |    |                                      |                                      |
|                                                                                                           | 10.2.16            |                                      | 42                                   | 1                                           | 1  |                                      |                                      |                                      | 37                                   |                                             | 3  |                                      |                                      |
|                                                                                                           | 10.2.17            |                                      | 38                                   | 6                                           | 20 |                                      |                                      |                                      | 44                                   | 1                                           | 19 |                                      |                                      |
|                                                                                                           | 10.2.18            |                                      | 40                                   | 4                                           | 7  |                                      |                                      |                                      | 48                                   | 3                                           | 1  |                                      |                                      |
|                                                                                                           | 10.2.19            |                                      | 37                                   | 5                                           | 9  |                                      |                                      |                                      | 34                                   | 4                                           | 4  |                                      |                                      |
|                                                                                                           | Total <sup>¶</sup> |                                      | 597                                  | 130                                         |    |                                      |                                      |                                      | 585                                  | 79                                          |    |                                      |                                      |
| ♂ <sup>‡</sup>                                                                                            | Batch <sup>¶</sup> | 663                                  |                                      |                                             |    | 8                                    |                                      | 595                                  |                                      |                                             |    | 8                                    |                                      |

\*Shaded cells are G<sub>3</sub> progeny positive for DsRed (DsRed<sup>+</sup>).

<sup>†</sup>Progeny of single G<sub>2</sub> female out-crossed to wild-type males.

<sup>‡</sup>27 G<sub>2</sub> males out-crossed to 270 wild-type females.

<sup>§</sup>The first column numbers are those mosquitoes with mosaicism in the eye. The second column numbers are mosquitoes with the ‘colored’ eye phenotypes consistent with mosaicism in the rest of the body. ‘ND’, not determined.

<sup>¶</sup> $\chi^2$  analyses show significant differences ( $p<<0.0001$ ) in DsRed<sup>+</sup>:DsRed<sup>-</sup> ratios from random segregation.

| <b>Table S7. G<sub>4</sub> larval phenotypes of line 10.1 G<sub>3</sub> outcrosses to wild-type mosquitoes.</b>                                              |                                      |                          |
|--------------------------------------------------------------------------------------------------------------------------------------------------------------|--------------------------------------|--------------------------|
| <b>(Cross)Transgenic parent (n) *</b>                                                                                                                        | <b>Larval phenotypes<sup>†</sup></b> |                          |
|                                                                                                                                                              | <b>DsRed<sup>+</sup></b>             | <b>DsRed<sup>-</sup></b> |
| <b>(1) DsRed<sup>+</sup>/kh<sup>w-</sup> ♀ (26)</b>                                                                                                          | 28                                   | 20                       |
| <b>(2) DsRed<sup>+</sup>/kh<sup>w-</sup> ♂ (32)</b>                                                                                                          | 332                                  | 303                      |
| <b>(5) DsRed<sup>+</sup>/kh<sup>w+</sup> ♀ (40)<sup>‡</sup></b>                                                                                              | 645                                  | 7                        |
| <b>(6) DsRed<sup>+</sup>/kh<sup>w+</sup> ♂ (40)<sup>‡</sup></b>                                                                                              | 949                                  | 6                        |
| *Progeny of batch-mated G <sub>3</sub> males or females out-crossed to wild-types of the opposite sex. (n) is the number of transgenic founder parents.      |                                      |                          |
| <sup>†</sup> Shaded cells are G <sub>4</sub> progeny positive for DsRed (DsRed <sup>+</sup> ).                                                               |                                      |                          |
| <sup>‡</sup> χ <sup>2</sup> analyses show significant differences ( $p < 0.0001$ ) in DsRed <sup>+</sup> :DsRed <sup>-</sup> ratios from random segregation. |                                      |                          |

| <b>Table S8. G<sub>4</sub> larval phenotypes of line 10.2 G<sub>3</sub> outcrosses to wild-type mosquitoes.</b>                                               |                                      |                          |
|---------------------------------------------------------------------------------------------------------------------------------------------------------------|--------------------------------------|--------------------------|
| <b>(Cross)Transgenic parent (n) *</b>                                                                                                                         | <b>Larval phenotypes<sup>†</sup></b> |                          |
|                                                                                                                                                               | <b>DsRed<sup>+</sup></b>             | <b>DsRed<sup>-</sup></b> |
| <b>(3) DsRed<sup>+</sup>/kh<sup>w-</sup> ♀ (43)</b>                                                                                                           | 204                                  | 120                      |
| <b>(4) DsRed<sup>+</sup>/kh<sup>w-</sup> ♂ (25)</b>                                                                                                           | 372                                  | 260                      |
| <b>(7) DsRed<sup>+</sup>/kh<sup>w+</sup> ♀ (50)<sup>‡</sup></b>                                                                                               | 1134                                 | 20                       |
| <b>(8) DsRed<sup>+</sup>/kh<sup>w+</sup> ♂ (50)<sup>‡</sup></b>                                                                                               | 609                                  | 19                       |
| *Progeny of batch-mated G <sub>3</sub> males or females out-crossed to wild-types of the opposite sex. (n) is the number of transgenic founder parents.       |                                      |                          |
| <sup>†</sup> Shaded cells are G <sub>4</sub> progeny positive for DsRed (DsRed <sup>+</sup> ).                                                                |                                      |                          |
| <sup>‡</sup> χ <sup>2</sup> analyses show significant differences ( $p < 0.0001$ ) in DsRed <sup>+</sup> :DsRed <sup>-</sup> ratios from random segregation . |                                      |                          |

| <b>Table S9. Table S9. G<sub>4</sub> larval phenotypes of lines 10.1 and 10.2 batch G<sub>3</sub> intercrosses.<sup>1</sup></b>       |                                          |                                          |
|---------------------------------------------------------------------------------------------------------------------------------------|------------------------------------------|------------------------------------------|
| <b>Cross</b>                                                                                                                          | <b>Larval phenotypes<sup>†</sup></b>     |                                          |
|                                                                                                                                       | <b>DsRed<sup>+</sup>/kh<sup>w-</sup></b> | <b>DsRed<sup>-</sup>/kh<sup>w-</sup></b> |
| <b>Line 10.1</b>                                                                                                                      | 428                                      | 71                                       |
| <b>Line 10.2</b>                                                                                                                      | 1851                                     | 361                                      |
| <sup>1</sup> G <sub>3</sub> DsRed-positive (DsRed <sup>+</sup> ) males and females were intercrossed as a single batch for each line. |                                          |                                          |
| <sup>†</sup> Shaded cells are G <sub>4</sub> progeny positive for DsRed (DsRed <sup>+</sup> ).                                        |                                          |                                          |

| Table S10. G <sub>4</sub> adult phenotypes of line 10.1 G <sub>3</sub> outcrosses to wild-type mosquitoes.                                                                                                                                                                                                                                                                                                                                                                                                                                                                                                     |                                             |                                          |                                          |                                             |    |                                          |                                          |                                          |                                          |                                             |    |                                          |                                          |
|----------------------------------------------------------------------------------------------------------------------------------------------------------------------------------------------------------------------------------------------------------------------------------------------------------------------------------------------------------------------------------------------------------------------------------------------------------------------------------------------------------------------------------------------------------------------------------------------------------------|---------------------------------------------|------------------------------------------|------------------------------------------|---------------------------------------------|----|------------------------------------------|------------------------------------------|------------------------------------------|------------------------------------------|---------------------------------------------|----|------------------------------------------|------------------------------------------|
| Line                                                                                                                                                                                                                                                                                                                                                                                                                                                                                                                                                                                                           | (Cross) Founder                             | Adult phenotypes <sup>†</sup>            |                                          |                                             |    |                                          |                                          |                                          |                                          |                                             |    |                                          |                                          |
|                                                                                                                                                                                                                                                                                                                                                                                                                                                                                                                                                                                                                |                                             | G <sub>4</sub> males                     |                                          |                                             |    |                                          |                                          | G <sub>4</sub> females                   |                                          |                                             |    |                                          |                                          |
|                                                                                                                                                                                                                                                                                                                                                                                                                                                                                                                                                                                                                |                                             | DsRed <sup>+</sup> /<br>kh <sup>w+</sup> | DsRed <sup>+</sup> /<br>kh <sup>w-</sup> | DsRed <sup>+</sup> /<br>mosaic <sup>†</sup> |    | DsRed <sup>-</sup> /<br>kh <sup>w+</sup> | DsRed <sup>-</sup> /<br>kh <sup>w-</sup> | DsRed <sup>+</sup> /<br>kh <sup>w+</sup> | DsRed <sup>+</sup> /<br>kh <sup>w-</sup> | DsRed <sup>+</sup> /<br>mosaic <sup>†</sup> |    | DsRed <sup>-</sup> /<br>kh <sup>w+</sup> | DsRed <sup>-</sup> /<br>kh <sup>w-</sup> |
| 10.1                                                                                                                                                                                                                                                                                                                                                                                                                                                                                                                                                                                                           | (1) DsRed <sup>+</sup> /kh <sup>w-</sup> ♀  |                                          | 6                                        |                                             | 5  | 4                                        | 3                                        |                                          | 1                                        | 3                                           | 4  | 7                                        | 2                                        |
|                                                                                                                                                                                                                                                                                                                                                                                                                                                                                                                                                                                                                | (2) DsRed <sup>+</sup> /kh <sup>w-</sup> ♂‡ | 153                                      |                                          |                                             |    | 111                                      |                                          | 153                                      |                                          |                                             |    | 137                                      |                                          |
|                                                                                                                                                                                                                                                                                                                                                                                                                                                                                                                                                                                                                | (5) DsRed <sup>+</sup> /kh <sup>w+</sup> ♀§ | 1                                        | 155                                      | 13                                          | 85 | 5                                        | 1                                        |                                          | 223                                      | 19                                          | 71 | 4                                        |                                          |
|                                                                                                                                                                                                                                                                                                                                                                                                                                                                                                                                                                                                                | (6) DsRed <sup>+</sup> /kh <sup>w+</sup> ♂§ | 403                                      |                                          |                                             |    | 3                                        |                                          | 479                                      |                                          |                                             |    | 3                                        |                                          |
| *Shaded cells are G <sub>4</sub> progeny positive for DsRed (DsRed <sup>+</sup> ).<br>†The first column numbers are those mosquitoes with mosaicism in the eye. The second column numbers are mosquitoes with the ‘colored’ eye phenotypes consistent with mosaicism in the rest of the body.<br>‡X <sup>2</sup> analyses show significant differences ( <i>p</i> =0.0137) in DsRed <sup>+</sup> :DsRed <sup>-</sup> ratios from random segregation .<br>§ X <sup>2</sup> analyses show significant differences ( <i>p</i> <<0.0001) in DsRed <sup>+</sup> :DsRed <sup>-</sup> ratios from random segregation. |                                             |                                          |                                          |                                             |    |                                          |                                          |                                          |                                          |                                             |    |                                          |                                          |

| Table S11. G <sub>4</sub> adult phenotypes of line 10.2 G <sub>3</sub> outcrosses to wild-type mosquitoes.                                                                                                          |                                                         |                                          |                                          |                                             |     |                                          |                                          |                                          |                                          |                                             |     |                                          |                                          |
|---------------------------------------------------------------------------------------------------------------------------------------------------------------------------------------------------------------------|---------------------------------------------------------|------------------------------------------|------------------------------------------|---------------------------------------------|-----|------------------------------------------|------------------------------------------|------------------------------------------|------------------------------------------|---------------------------------------------|-----|------------------------------------------|------------------------------------------|
| Line                                                                                                                                                                                                                | (Cross) Founder                                         | Adult phenotypes <sup>*</sup>            |                                          |                                             |     |                                          |                                          |                                          |                                          |                                             |     |                                          |                                          |
|                                                                                                                                                                                                                     |                                                         | G <sub>4</sub> males                     |                                          |                                             |     |                                          |                                          | G <sub>4</sub> females                   |                                          |                                             |     |                                          |                                          |
|                                                                                                                                                                                                                     |                                                         | DsRed <sup>+</sup> /<br>kh <sup>w+</sup> | DsRed <sup>+</sup> /<br>kh <sup>w-</sup> | DsRed <sup>+</sup> /<br>mosaic <sup>†</sup> |     | DsRed <sup>-</sup> /<br>kh <sup>w+</sup> | DsRed <sup>-</sup> /<br>kh <sup>w-</sup> | DsRed <sup>+</sup> /<br>kh <sup>w+</sup> | DsRed <sup>+</sup> /<br>kh <sup>w-</sup> | DsRed <sup>+</sup> /<br>mosaic <sup>†</sup> |     | DsRed <sup>-</sup> /<br>kh <sup>w+</sup> | DsRed <sup>-</sup> /<br>kh <sup>w-</sup> |
| 10.2                                                                                                                                                                                                                | (3) DsRed <sup>+</sup> /kh <sup>w-</sup> ♀ <sup>‡</sup> |                                          | 40                                       | 1                                           | 34  | 36                                       | 41                                       |                                          | 41                                       |                                             | 53  | 23                                       | 3                                        |
|                                                                                                                                                                                                                     | (4) DsRed <sup>+</sup> /kh <sup>w-</sup> ♂ <sup>§</sup> | 157                                      |                                          |                                             |     | 101                                      |                                          | 160                                      |                                          |                                             |     | 139                                      |                                          |
|                                                                                                                                                                                                                     | (7) DsRed <sup>+</sup> /kh <sup>w+</sup> ♀ <sup>¶</sup> | 3                                        | 288                                      | 8                                           | 120 | 5                                        |                                          | 1                                        | 357                                      | 16                                          | 145 |                                          | 3                                        |
|                                                                                                                                                                                                                     | (8) DsRed <sup>+</sup> /kh <sup>w+</sup> ♂ <sup>¶</sup> | 258                                      |                                          |                                             |     | 10                                       |                                          | 307                                      |                                          |                                             |     | 8                                        |                                          |
| <sup>*</sup> Shaded cells are G <sub>4</sub> progeny positive for DsRed (DsRed <sup>+</sup> ).                                                                                                                      |                                                         |                                          |                                          |                                             |     |                                          |                                          |                                          |                                          |                                             |     |                                          |                                          |
| <sup>†</sup> The first column numbers are those mosquitoes with mosaicism in the eye. The second column numbers are mosquitoes with the ‘colored’ eye phenotypes consistent with mosaicism in the rest of the body. |                                                         |                                          |                                          |                                             |     |                                          |                                          |                                          |                                          |                                             |     |                                          |                                          |
| <sup>‡</sup> $\chi^2$ analyses show significant differences ( $p<0.0001$ ) in DsRed <sup>+</sup> :DsRed <sup>-</sup> ratios from random segregation.                                                                |                                                         |                                          |                                          |                                             |     |                                          |                                          |                                          |                                          |                                             |     |                                          |                                          |
| <sup>§</sup> $\chi^2$ analyses show significant differences ( $p=0.0011$ ) in DsRed <sup>+</sup> :DsRed <sup>-</sup> ratios from random segregation.                                                                |                                                         |                                          |                                          |                                             |     |                                          |                                          |                                          |                                          |                                             |     |                                          |                                          |
| <sup>¶</sup> $\chi^2$ analyses show significant differences ( $p<<0.0001$ ) in DsRed <sup>+</sup> :DsRed <sup>-</sup> ratios from random segregation.                                                               |                                                         |                                          |                                          |                                             |     |                                          |                                          |                                          |                                          |                                             |     |                                          |                                          |

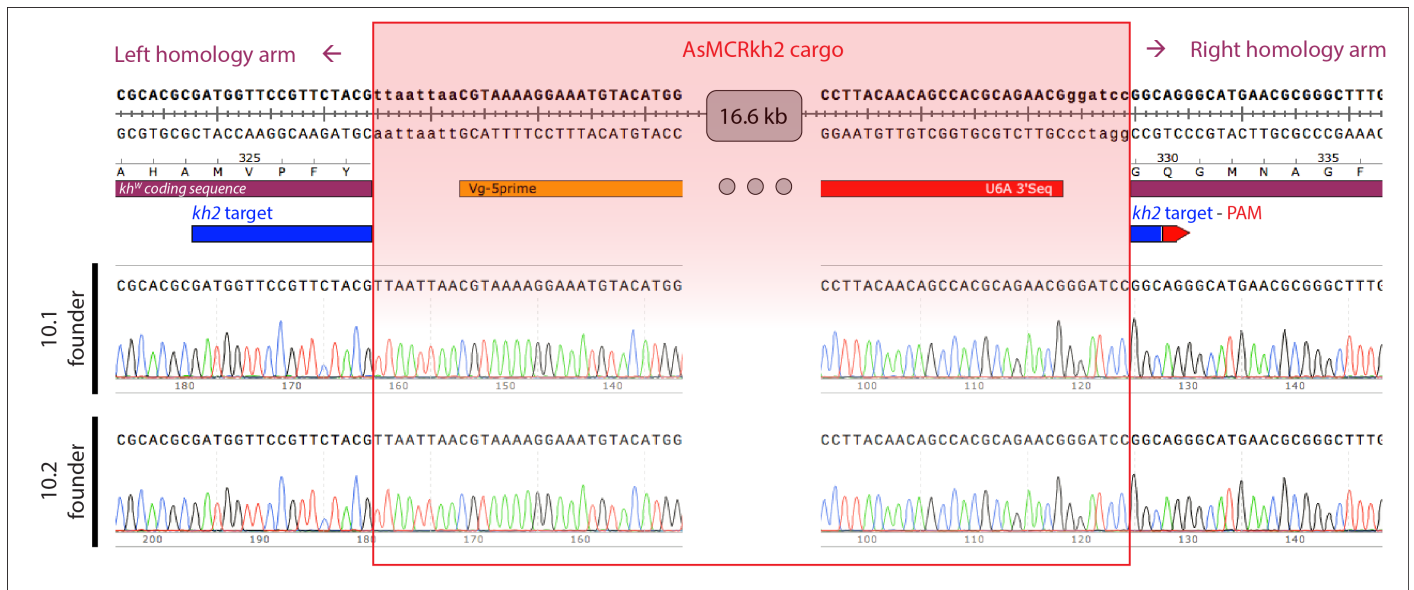

**Figure S1. Molecular confirmation of the precise insertions of the AsMCRkh2 cargo into the *kh<sup>W</sup>* locus.** Sequencing of the 5'- and 3'-end G1F2-vg5'1 and U6F1-G2R2 junction amplification fragments (left and right, respectively) amplified from the G<sub>1</sub> founder male mosquitoes 10.1 and 10.2 (lower sequencing traces) revealed a perfect match to the sequences from Cas9-mediated cleavage at the kh2 target site and precise integration of the ASMCRkh2 cargo (Figure 1) into that site. Positions of the kh2 homology arms (maroon boxes), guide RNA targeting sequences (blue boxes), PAM site (red arrowhead) and the PCR primers Vg-5prime (orange box) and U6A3'Seq (red box) are shown. Genomic nucleotides depicted in lower case letters indicate restriction endonuclease enzyme recognition sites used in the construction of the AsMCRkh2 cargo.

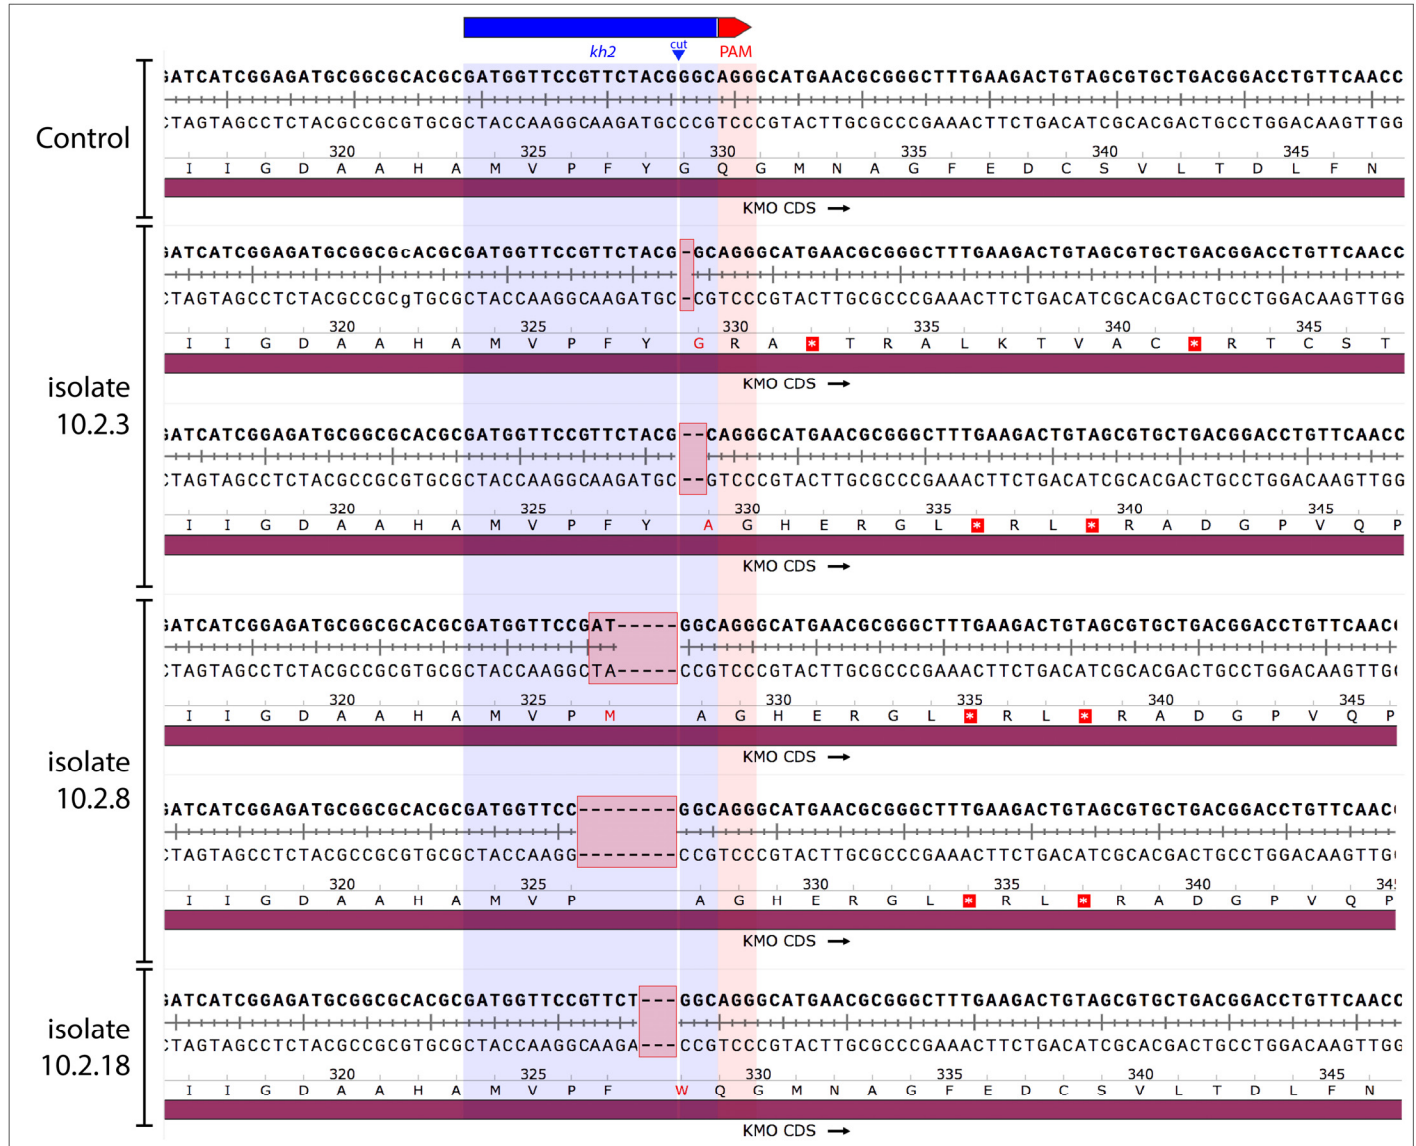

**Figure S2. Mutated sequences at the *kh2* target site in selected  $G_2$  transgenic mosquitoes.** The top sequence is the wild-type reference sequence at the *kh2* target site from a control mosquito. The PAM sequence is shaded in peach, the 20 nt targeting sequence is shaded in purple, indels are shaded in pink, and the gRNA directed cleavage site by a thin vertical white line. NHEJ events were detected in three different white-eyed *DsRed<sup>+</sup>* mosquitoes. Different sequences were isolated by cloning PCR products generated from the *kh<sup>w</sup>* locus in lines 10.2.3 and 10.2.8, supporting the conclusion that these mosquitoes are mosaics carrying at least two distinct NHEJ-directed mutations. Isolate 10.2.18 is derived from a direct sequencing reaction of an amplification product confirming that this transgenic mosquito had only a single NHEJ event. In contrast to the other two cases, this mutation maintains the translation frame but nonetheless results in a white-eye phenotype supporting the conclusion that the deletion of a single amino acid (Y328) and substitution of its neighbor (G329W) eliminates or greatly reduces kynurenine hydroxylase enzymatic activity.

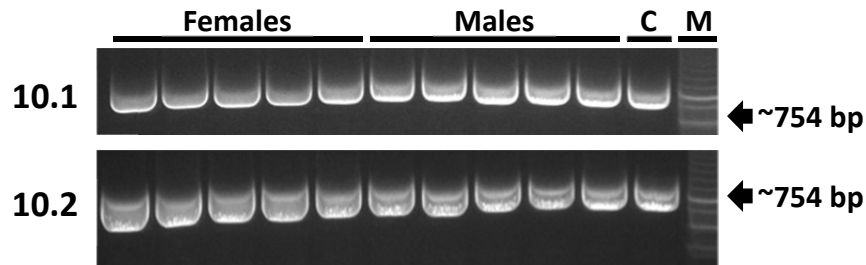

**Figure S3. Gene amplification of the *kh2* target sites in selected  $G_3$  founder mosquitoes.** Genomic DNA prepared from individual male and female  $G_3$  founder mosquitoes positive for DsRed and with white eyes ( $DsRed^+/kh^w$ ; crosses 1 - 4, Tables S10 and S11) was used with the gene-specific primers, vg505 and vg557 (Table S2) to amplify a portion of the *kh<sup>w</sup>* gene. The diagnostic fragment at 754 base-pairs indicates at least one of the chromosomes had a *kh<sup>w</sup>* gene without the large ~17 kb transgene cargo insert. These alleles must be mutant because the eye phenotype of each mosquito from which the DNA was derived is white (*kh<sup>w</sup>*). 'C' is a control sample of DNA from a wild-type mosquito. 'M' are the molecular-weight markers.

## Supporting Materials and Methods.

### Construction of the *vasa*-Cas9 cassette.

The *Drosophila melanogaster vasa* gene and its *Anopheles gambiae* ortholog AGAP008578 (5) were used as BLAST search queries to identify the ASTE003241 gene as the putative unique *Anopheles stephensi* ortholog. A 4009 bp genomic fragment comprising the *Anopheles stephensi vasa* promoter and regulatory sequences preceding the predicted translational start site was amplified using oligonucleotides vg453/vg454. Four DNA fragments were then joined in the following order: 1) the *An. stephensi vasa* regulatory fragment; 2) a recoded Cas9 gene codon-optimized for translation in *Anopheles stephensi* (pUC57Kan-T7-AsCas9 (amplified with the oligonucleotides vg455/vg456); 3) a 1014bp fragment following the translational stop codon (TAA) of the ASTE003241 (amplified using the oligonucleotides vg457/458), 4) the backbone of the pBacDsRed plasmid (amplified using the oligonucleotides vg451/vg452). These four amplicons were purified, treated with the restriction enzyme *DpnI* to remove methylated DNA and joined in a Gibson assembly (New England Biolabs, #E5510S) reaction to obtain the plasmid pVG160 (pVG160\_pBacDsRed-attB\_Aste-Vasa-Cas9).

**Construction of the U6A-kh-gRNA cassette.** A 923bp fragment spanning the annotated *Anopheles stephensi* U6-snRNA gene ASTE015697 was amplified using the oligonucleotides vg464/vg465, and the amplification product was cloned into pCR2.1-TOPO using a TA Topoisomerase Cloning Kit (Invitrogen, #450641). The resulting plasmid was used as a template for site-directed mutagenesis using the oligonucleotides vg500/vg501 thereby substituting the U6 transcript with a 2x*BbsI* restriction site linker followed by the gRNA core sequence. The resulting plasmid (pVG145) serves as vector for one-step insertion of 20 bp gRNA guide sequences to generate complete gRNAs under the control of the *An. stephensi* U6 RNA polymerase-III promoter. pVG145 was cut with the restriction enzyme *BbsI* and a linker generated by annealing the oligonucleotides vg537/vg538 was ligated to close the gap, the resulting plasmid (pVG163) expresses a gRNA targeting cleavage of the *kynurenine hydroxylase-white* (*kh<sup>w</sup>*) coding sequence at the sequence “GATGGTTCCGTTCTACG/**GGCAGG**”; the **bolded “GGG”** corresponds to the encoded glycine 329 of the *kh<sup>w</sup>* gene product.

**Construction of the homology arms backbone (pVG159).** To minimize the final vector size, a minimal 1943 bp backbone fragment of pUC19 was amplified using vg494/vg495 and fused to a 2.4kb genomic fragment from the *An. stephensi kh<sup>w</sup>* locus (amplified with vg498/vg499), using Gibson assembly, to yield the plasmid pVG159.

**Construction of the pAsMCRkh construct.** The final construct, pAsMCRkh, was assembled using restriction cloning in two steps. First, a three-way fusion was generated comprising: 1) a fragment containing the pUC19 plasmid backbone and the *kh<sup>w</sup>* homology arms was amplified from pVG159 using vg543/vg552, which added *PacI* and *BamHI* restriction enzyme cut sites at the ends; 2) a 6.6kb DNA fragment including the 3xP3-DsRed eye marker and a dual-single chain (scFv) antibody cassette expressing m1C3 and m2A10 (1,3) and amplified with vg544/vg551, which added *PacI* and *PspXI* sites at the ends; and 3) the U6A-kh2-gRNA cassette (amplified from pVG163 using vg553/vg554, which added *PspXI* and *BamHI* sites at the ends). Each of the three fragments was cut with the respective restriction enzymes followed by treatment with *DpnI* to remove the methylated templates, and ligated together to obtain the intermediate plasmid pVG165. In the second step, the two above fragments were joined. The *vasa*-Cas9 cassette was amplified from pVG160 (using vg546/vg555, which added *PspXI* sites at both ends) and the obtained amplicon was cut with *PspXI* and *DpnI*, and then ligated to pVG165 linearized with *PspXI* (and treated with calf intestinal alkaline phosphatase to obtain the final construct).

**Reagents:** all amplification steps were performed using Phusion High-Fidelity DNA Polymerase (for fragments <6kb, New England Biolabs, Cat.#M0530S) or Q5 High-Fidelity DNA Polymerase (for fragments >6kb, New England Biolabs, Cat.#M0491S). The enzymes mentioned were purchased from New England Biolabs: *BamHI*-

HF (R3136S), *BbsI* (R0539S), *DpnI* (R0176S), *PacI* (R0547S), *PspXI* (R0656S), calf intestinal alkaline phosphatase (M0290S).

## References

1. Isaacs, A.T., Li, F., Jasinskiene, N., Chen, X., Nirmala, X., Marinotti, O., Vinetz, J.M. and James, A.A. (2011) Engineered resistance to *Plasmodium falciparum* development in transgenic *Anopheles stephensi*. *PLoS Pathogens* 7(4): PMID: 21533066, PMCID: PMC3080844
2. Nirmala, X., Marinotti, O., Sandoval, J.M., Phin, S., Gakhar, S., Jasinskiene, N. and James, A.A. (2006) Functional characterization of the promoter of the vitellogenin gene, *AsVgI*, of the malaria vector, *Anopheles stephensi*. *Insect. Biochem. Molec. Biol.*, **36**, 694-700. PMID: 16935218
3. Isaacs, A.T., Jasinskiene, N., Tretiakov, M., Thiery, I., Zettor, A., Bourgouin, C. and James, A.A. (2012) Transgenic *Anopheles stephensi* co-expressing single-chain antibodies resist *Plasmodium falciparum* development. *Proc. Natl. Acad. Sci. USA*, **109**, E1922-E1930. PMID:22689959. *PNAS PLUS*, **109**, 11070-11071.
4. Chen, X., Marinotti, O., Whitman, L., Jasinskiene N., Romans, P and James A.A. (2007) The *Anopheles gambiae* vitellogenin gene (*VGT2*) promoter directs persistent accumulation of a reporter gene product in transgenic *Anopheles stephensi* following multiple blood meals. *Am. J. Trop. Med. Hygiene* **76**, 1118-1124. PMID 17556621
5. Papathanos, P.A., Windbichler, N., Menichelli, M., Burt A. and Crisanti, A. (2009) The vasa regulatory region mediates germline expression and maternal transmission of proteins in the malaria mosquito *Anopheles gambiae*: a versatile tool for genetic control strategies. *BMC Mol Biol.* 2009 Jul 2;10:65. doi: 10.1186/1471-2199-10-65. PMID:19573226
